# Supplementary material for: PKNOX2 suppresses lung cancer cell proliferation by inhibiting the PI3K/AKT/mTOR axis
Source: PubMed Central journal article supplement — Exp Ther Med. 2023 Mar 28;25(5):217. doi: 10.3892/etm.2023.11917 (PMC10133798; doi:10.3892/etm.2023.11917), 2023-03-28

Figure S1. Expression of PKNOX2 in LC tissues with EGFR or ALK mutation. Data employed from the GSE31210 dataset revealed that PKNOX2 expression was downregulated in (A) EGFR<sup>+</sup> or (B) ALK-fusion<sup>+</sup> LC tissues compared with that in normal tissues. GSE31210: Normal tissues, n=20; LC with EGFR<sup>+</sup> tissues, n=127; LC with ALK-fusion<sup>+</sup> tissues, n=11. PKNOX2, PBX/knotted 1 homeobox 2.

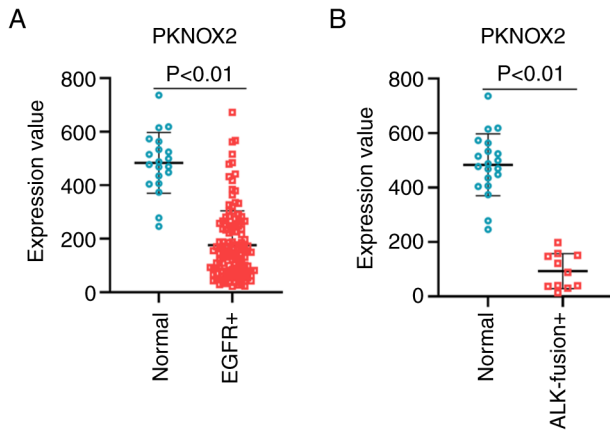

Supplement: Supplementary_Data.pdf [file Supplementary_Data.pdf]
